# Supplementary material
Source: Springer Nature journal article supplement (https://www.springermedizin.de/resource/supplementary/12885_2006_643_MOESM1_ESM.pdf/9469974)
Supplement: MOESM1 [file 9469974]

Potentially relevant citations identified and screened for possible retrieval (n = 3,848)

Citations excluded via screening of bibliographic records, with reasons (n = 2,937):

- a. not breast cancer in women (n = 928);
- b. not breast cancer diagnosis or treatment (or followup or reporting/documentation) (n = 1,137);
- c. not a quality measure/ment, clinical practice guideline, systematic review, or, commentary/editorial (n = 860); &
- d. not a quality measure/ment (i.e., a clinical practice guideline, systematic review, or, commentary/editorial) (n = 12)\*

Reports retrieved for more detailed assessment of relevance (n = 911)

Reports excluded via Level 2 relevance assessment, with reasons (n = 610):

- a. not breast cancer in women (n = 52);
- b. not breast cancer diagnosis or treatment (or followup or reporting/documentation) (n = 40); &
- c. not a quality measure, clinical practice guideline, systematic review, or, commentary/ editorial (n = 518)

Reports excluded via Level 3 relevance assessment, with reasons (n = 225)\*

- a. not a quality measure/ment (clinical practice guideline) (n = 94);
- b. not a quality measure/ment (systematic review) (n = 115); &
- c. not a quality measure/ment (commentary/editorial) (n = 16)

Other reports not proceeding, with reasons (n = 16):

- a. never retrieved (n = 4); &
- b. retrieved too late to complete screening (n = 12)

Reports (n = 60) describing unique studies (n = 58) entered into qualitative synthesis (i.e., 2 studies were each described by 2 reports)

Meta-analysis deemed inappropriate for each research question
